# Supplementary material for: Reprograming of Gene Expression of Key Inflammatory Signaling Pathways in Human Peripheral Blood Mononuclear Cells by Soybean Lectin and Resveratrol
Source: MDPI journal article supplement (doi:10.3390/ijms232112946), 2022-10-26
Supplement: s1 [file s1]

## SUPPLEMENTARY MATERIALS

**TABLE S1. GENES UPREGULATED BY RESVERATROL ALONE\*.**

| RES    | Control | log2 Fold | P value                | Gene Name   | Gene Description                                               |
|--------|---------|-----------|------------------------|-------------|----------------------------------------------------------------|
| 6.825  | 0.265   | 4.648     | $1.45 \times 10^{-12}$ | ITGAD       | Integrin-alpha D                                               |
| 46.964 | 9.570   | 2.294     | $2.33 \times 10^{-07}$ | CTC-205M6.5 | -                                                              |
| 1687.4 |         |           |                        |             | nuclear_paraspeckle_assembly_transcript_1_(non-protein coding) |
| 7      | 414.500 | 2.025     | $2.00 \times 10^{-06}$ | NEAT1       |                                                                |
| 33.109 | 7.7625  | 2.091     | $2.54 \times 10^{-06}$ | TMEM119     | transmembrane_protein_119                                      |

\*These data represent the genes that are upregulated by resveratrol alone as compared to a vehicle control in PBMCs (incubated for 3h). RNAs were extracted and subjected to RNAseq analysis. This data has been obtained by using the DEG program.

**TABLE S2. (A) LPS-INDUCED GENES MODULATED BY RESVERATROL\*. (B) LPS-INDUCED GENES NOT MODULATED BY RESVERATROL\*\*. (C) DOWN-REGULATED LPS MODULATED GENES NOT AFFECTED BY RESVERATROL\*\*.**

### A.

| LPS + RES | LPS      | Log2 Fold | P value                | Gene Name  | Gene Description                                                                  |
|-----------|----------|-----------|------------------------|------------|-----------------------------------------------------------------------------------|
| 0.0529    | 9.74207  | -7.3514   | $1.41 \times 10^{-18}$ | CCL8       | chemokine_(C-C_motif)_ligand_8                                                    |
| 27.447    | 476.382  | -4.1171   | $1.49 \times 10^{-18}$ | CYP1B1     | cytochrome_P450_family_1_subfamily_B_polypeptide_1                                |
| 7.7361    | 135.790  | -4.1325   | $4.13 \times 10^{-18}$ | CCL2       | chemokine_(C-C_motif)_ligand_2                                                    |
| 125.420   | 1442.97  | -3.5241   | $7.36 \times 10^{-15}$ | RSAD2      | radical_S-adenosyl_methionine_domain_containing_2                                 |
| 4.715     | 61.064   | -3.6929   | $8.29 \times 10^{-15}$ | RGL1       | ral_guanine_nucleotide_dissociation_stimulator-like_1                             |
| 8.954     | 108.360  | -3.596    | $1.04 \times 10^{-14}$ | CCL7       | chemokine_(C-C_motif)_ligand_7                                                    |
| 62.895    | 689.129  | -3.453    | $2.18 \times 10^{-14}$ | OAS3       | 2'-5'-oligoadenylate_synthetase_3_100kDa                                          |
| 0.105     | 6.422    | -5.834    | $5.39 \times 10^{-14}$ | IL19       | interleukin_19                                                                    |
| 0.264     | 8.381    | -4.948    | $5.55 \times 10^{-14}$ | CYP1B1-AS1 | CYP1B1_antisense_RNA_1                                                            |
| 57.067    | 593.613  | -3.378    | $6.55 \times 10^{-14}$ | CMPK2      | cytidine_monophosphate_(UMP-CMP) kinase_2_mitochondrial                           |
| 5.0337    | 54.642   | -3.438    | $2.76 \times 10^{-13}$ | CXCL11     | chemokine_(C-X-C_motif)_ligand_11                                                 |
| 6.358     | 63.133   | -3.310    | $9.45 \times 10^{-13}$ | IFNG       | interferon_gamma                                                                  |
| 2.331     | 25.960   | -3.473    | $1.33 \times 10^{-12}$ | SIGLEC1    | sialic_acid_binding_Ig-like_lectin_1_sialoadhesin                                 |
| 0.688     | 11.102   | -3.997    | $1.61 \times 10^{-12}$ | GGT5       | gamma-glutamyltransferase_5                                                       |
| 13.988    | 118.319  | -3.079    | $8.84 \times 10^{-12}$ | ARHGEF11   | Rho_guanine_nucleotide_exchange_factor_(GEF)_11                                   |
| 23.526    | 194.569  | -3.047    | $1.01 \times 10^{-11}$ | NEU4       | sialidase_4                                                                       |
| 0.635     | 9.252    | -3.849    | $2.12 \times 10^{-11}$ | IL10       | interleukin_10                                                                    |
| 1.006     | 12.136   | -3.582    | $2.65 \times 10^{-11}$ | EDN1       | endothelin_1                                                                      |
| 6.093     | 50.397   | -3.046    | $3.61 \times 10^{-11}$ | CSF2       | colony_stimulating_factor_2_(granulocyte-macrophage)                              |
| 17.538    | 134.484  | -2.938    | $5.35 \times 10^{-11}$ | USP18      | ubiquitin_specific_peptidase_18                                                   |
| 5.351     | 43.920   | -3.035    | $5.93 \times 10^{-11}$ | EGR2       | early_growth_response_2                                                           |
| 61.358    | 438.99   | -2.838    | $1.16 \times 10^{-10}$ | SAMD9L     | sterile_alpha_motif_domain_containing_9-like                                      |
| 0.105     | 3.973    | -5.142    | $2.01 \times 10^{-10}$ | LAMA2      | laminin_alpha_2                                                                   |
| 1023.76   | 6937.936 | -2.760    | $2.90 \times 10^{-10}$ | THBS1      | thrombospondin_1                                                                  |
| 171.677   | 1129.917 | -2.718    | $5.22 \times 10^{-10}$ | MX1        | myxovirus_(influenza_virus)_resistance_1_interferon-inducible_protein_p78_(mouse) |
| 237.487   | 1548.772 | -2.705    | $6.12 \times 10^{-10}$ | HELZ2      | helicase_with_zinc_finger_2_transcriptional_coactivator                           |
| 0.635     | 7.510    | -3.548    | $7.95 \times 10^{-10}$ | MACC1      | metastasis_associated_in_colon_cancer_1                                           |

|         |         |        |                         |           |                                                                                               |
|---------|---------|--------|-------------------------|-----------|-----------------------------------------------------------------------------------------------|
| 3.020   | 22.804  | -2.913 | 9.03 x10 <sup>-10</sup> | SPINK1    | serine_peptidase_inhibitor_Kazal_type_1                                                       |
| 28.560  | 181.235 | -2.665 | 1.44 x10 <sup>-09</sup> | PNPT1     | polyribonucleotide_nucleotidyltransferase_1                                                   |
| 0.688   | 7.565   | -3.444 | 1.57 x10 <sup>-09</sup> | PNPLA1    | patatin-like_phospholipase_domain_containing_1                                                |
| 30.255  | 4.571   | 2.724  | 3.76 x10 <sup>-09</sup> | TMEM119   | transmembrane_protein_119                                                                     |
| 51.026  | 302.657 | -2.568 | 3.92 x10 <sup>-09</sup> | CXCL10    | chemokine_(C-X-C_motif)_ligand_10                                                             |
| 104.331 | 610.920 | -2.549 | 4.59 x10 <sup>-09</sup> | SLC39A8   | solute_carrier_family_39_(zinc_transporter)_member_8                                          |
| 68.035  | 395.343 | -2.538 | 5.47 x10 <sup>-09</sup> | EIF2AK2   | eukaryotic_translation_initiation_factor_2-alpha_kinase_2                                     |
| 4.450   | 28.301  | -2.666 | 8.53 x10 <sup>-09</sup> | ETV7      | ets_variant_7                                                                                 |
| 3.073   | 20.191  | -2.713 | 1.02 x10 <sup>-08</sup> | MGAM      | maltase-glucoamylase_(alpha-glucosidase)                                                      |
| 2.1724  | 0       | 8.342  | 1.09 x10 <sup>-08</sup> | DKK2      | dickkopf_2_homolog_(Xenopus_laevis)                                                           |
| 14.7833 | 84.1954 | -2.509 | 1.36 x10 <sup>-08</sup> | IFI44L    | interferon-induced_protein_44-like                                                            |
| 1.69558 | 11.9190 | -2.808 | 1.76 x10 <sup>-08</sup> | NEXN      | nexilin_(F_actin_binding_protein)                                                             |
| 1.43064 | 10.6128 | -2.885 | 2.07 x10 <sup>-08</sup> | INHBA-AS1 | INHBA_antisense_RNA_1                                                                         |
| 106.503 | 560.359 | -2.395 | 3.04 x10 <sup>-08</sup> | INHBA     | inhibin_beta_A                                                                                |
| 37.832  | 196.474 | -2.376 | 4.55 x10 <sup>-08</sup> | OAS1      | 2'-5'-oligoadenylate_synthetase_1_40/46kDa                                                    |
| 6.305   | 34.940  | -2.469 | 4.72 x10 <sup>-08</sup> | PDGFB     | platelet-derived_growth_factor_beta_polypeptide                                               |
| 0.847   | 6.966   | -3.028 | 4.92 x10 <sup>-08</sup> | ABCA6     | ATP-binding_cassette_sub-family_A_(ABC1)_member_6                                             |
| 8.371   | 1.142   | 2.865  | 5.13 x10 <sup>-08</sup> | C2CD4B    | C2_calcium-dependent_domain_containing_4B                                                     |
| 2.914   | 17.361  | -2.571 | 6.05 x10 <sup>-08</sup> | IL36G     | interleukin_36_gamma                                                                          |
| 26.705  | 136.552 | -2.354 | 6.60 x10 <sup>-08</sup> | NCOA7     | nuclear_receptor_coactivator_7                                                                |
| 0.847   | 6.803   | -2.994 | 7.09 x10 <sup>-08</sup> | BATF2     | basic_leucine_zipper_transcription_factor_ATF-like_2                                          |
| 3.921   | 22.314  | -2.506 | 7.16 x10 <sup>-08</sup> | MLKL      | mixed_lineage_kinase_domain-like                                                              |
| 4.185   | 0.380   | 3.434  | 8.61 x10 <sup>-08</sup> | WDR78     | WD_repeat_domain_78                                                                           |
| 74.128  | 364.212 | -2.296 | 1.01 x10 <sup>-07</sup> | IFI6      | interferon_alpha-inducible_protein_6                                                          |
| 0.211   | 3.211   | -3.879 | 1.12 x10 <sup>-07</sup> | GCNT2     | glucosaminyl_(N-acetyl)_transferase_2_I-branching_enzyme_(I_blood_group)                      |
| 17.379  | 3.047   | 2.509  | 1.22 x10 <sup>-07</sup> | SLC9A7P1  | solute_carrier_family_9_subfamily_A_(NHE7_cation_prot on_antipporter_7)_member_7_pseudogene_1 |
| 0.317   | 3.755   | -3.534 | 1.42 x10 <sup>-07</sup> | LEKR1     | leucine_glutamate_and_lysin e_rich_1                                                          |
| 148.575 | 709.865 | -2.256 | 1.55 x10 <sup>-07</sup> | SLC7A11   | solute_carrier_family_7_(anionic_amino_acid_transporter_light_chain_xc-system)_member_11      |
| 52.404  | 251.11  | -2.260 | 1.61 x10 <sup>-07</sup> | HERC6     | HECT_and_RLD_domain_containing_E3_ubiquitin_prote in_ligase_family_member_6                   |
| 2.331   | 13.442  | -2.524 | 1.76 x10 <sup>-07</sup> | CACNA1A   | calcium_channel_voltage-dependent_P/Q_type_alpha_1A_subunit                                   |
| 2.702   | 14.912  | -2.461 | 2.39 x10 <sup>-07</sup> | CXCL9     | chemokine_(C-X-C_motif)_ligand_9                                                              |
| 0       | 1.741   | -8.025 | 2.40 x10 <sup>-07</sup> | KRT8P42   | keratin_8_pseudogene_42                                                                       |
| 59.080  | 275.444 | -2.220 | 2.50 x10 <sup>-07</sup> | DHX58     | DEXH_(Asp-Glu-X-His)_box_polypeptide_58                                                       |
| 0.794   | 6.041   | -2.915 | 2.53 x10 <sup>-07</sup> | IL27      | interleukin_27                                                                                |
| 18.810  | 89.420  | -2.248 | 2.57 x10 <sup>-07</sup> | CD93      | CD93_molecule                                                                                 |
| 2.755   | 15.075  | -2.449 | 2.63 x10 <sup>-07</sup> | SYNPO2    | synaptopodin_2                                                                                |
| 0.105   | 2.394   | -4.413 | 2.67 x10 <sup>-07</sup> | ZNF608    | zinc_finger_protein_608                                                                       |
| 2.914   | 15.619  | -2.419 | 3.25 x10 <sup>-07</sup> | BAALC     | brain_and_acute_leukemia_cytoplasmic                                                          |
| 48.377  | 219.550 | -2.182 | 3.99 x10 <sup>-07</sup> | TNFSF10   | tumor_necrosis_factor_(ligand)_superfamily_member_10                                          |

|         |         |        |                         |                |                                                                                  |
|---------|---------|--------|-------------------------|----------------|----------------------------------------------------------------------------------|
| 136.600 | 614.022 | -2.168 | 4.25 x10 <sup>-07</sup> | MX2            | myxovirus_(influenza_virus)_resistance_2_(mouse)                                 |
| 0.211   | 2.884   | -3.724 | 4.69 x10 <sup>-07</sup> | NDC80          | NDC80_kinetochore_complex_component                                              |
| 38.20   | 170.894 | -2.161 | 5.48 x10 <sup>-07</sup> | PARP10         | poly_(ADP-ribose)_polymerase_family_member_10                                    |
| 0.158   | 2.503   | -3.921 | 7.30 x10 <sup>-07</sup> | LRRC3D<br>N    | LRRC3_downstream_neighbor_(non-protein_coding)                                   |
| 2.649   | 13.660  | -2.363 | 7.51x10 <sup>-07</sup>  | DLGAP1<br>-AS2 | DLGAP1_antisense_RNA_2                                                           |
| 1.854   | 10.123  | -2.444 | 7.73 x10 <sup>-07</sup> | STAP1          | signal_transducing_adaptor_family_member_1                                       |
| 1.165   | 7.238   | -2.627 | 7.82 x10 <sup>-07</sup> | SLC1A2         | solute_carrier_family_1_(glial_high_affinity_glutamate_tr<br>ansporter)_member_2 |
| 0.476   | 4.081   | -3.079 | 8.04 x10 <sup>-07</sup> | MUC1           | mucin_1_cell_surface_associated                                                  |
| 8.107   | 37.172  | -2.196 | 8.35 x10 <sup>-07</sup> | AK4            | adenylate_kinase_4                                                               |
| 0.105   | 2.231   | -4.311 | 8.61 x10 <sup>-07</sup> | IL36RN         | interleukin_36_receptor_antagonist                                               |
| 2.755   | 0.217   | 3.621  | 9.87 x10 <sup>-07</sup> | TIGD3          | tigger_transposable_element_derived_3                                            |
| 3.179   | 0.326   | 3.257  | 1.46 x10 <sup>-06</sup> | HIST1H2<br>AG  | histone_cluster_1_H2ag                                                           |
| 0.317   | 3.156   | -3.284 | 1.46 x10 <sup>-06</sup> | GAPDHP<br>14   | glyceraldehyde-3-<br>phosphate_dehydrogenase_pseudogene_14                       |
| 237.328 | 983.024 | -2.050 | 1.54 x10 <sup>-06</sup> | OAS2           | 2'-5'-oligoadenylate_synthetase_2_69/71kDa                                       |
| 37.196  | 155.70  | -2.065 | 1.61 x10 <sup>-06</sup> | PRF1           | perforin_1_(pore_forming_protein)                                                |
| 89.760  | 369.328 | -2.040 | 1.80 x10 <sup>-06</sup> | XAF1           | XIAP_associated_factor_1                                                         |
| 0.529   | 4.08187 | -2.929 | 1.82 x10 <sup>-06</sup> | XCR1           | chemokine_(C_motif)_receptor_1                                                   |
| 47.953  | 198.433 | -2.048 | 1.82 x10 <sup>-06</sup> | SP110          | SP110_nuclear_body_protein                                                       |
| 1.006   | 6.095   | -2.590 | 2.25 x10 <sup>-06</sup> | ASB2           | ankyrin_repeat_and_SOCS_box_containing_2                                         |
| 0.423   | 3.537   | -3.041 | 2.27 x10 <sup>-06</sup> | PRR16          | proline_rich_16                                                                  |
| 4.821   | 21.606  | -2.162 | 2.29 x10 <sup>-06</sup> | DAGLA          | diacylglycerol_lipase_alpha                                                      |
| 72.274  | 292.969 | -2.019 | 2.31 x10 <sup>-06</sup> | EPSTI1         | epithelial_stromal_interaction_1_(breast)                                        |
| 11.551  | 2.340   | 2.3    | 2.37 x10 <sup>-06</sup> | HPN            | Hepsin                                                                           |
| 0       | 1.415   | -7.726 | 2.40 x10 <sup>-06</sup> | PDZD2          | PDZ_domain_containing_2                                                          |
| 19.022  | 78.099  | -2.037 | 2.63 x10 <sup>-06</sup> | TNFSF1<br>3B   | tumor_necrosis_factor_(ligand)_superfamily_member_13<br>b                        |
| 0.688   | 4.626   | -2.735 | 2.94 x10 <sup>-06</sup> | VNN3           | vanin_3                                                                          |
| 4.821   | 0.761   | 2.651  | 3.02 x10 <sup>-06</sup> | MUC20          | mucin_20_cell_surface_associated                                                 |
| 2.755   | 0.272   | 3.308  | 3.22 x10 <sup>-06</sup> | FRY-AS1        | FRY_antisense_RNA_1                                                              |
| 1.483   | 7.837   | -2.395 | 3.40 x10 <sup>-06</sup> | CA13           | carbonic_anhydrase_XIII                                                          |
| 10.756  | 2.231   | 2.265  | 3.88 x10 <sup>-06</sup> | RASL11<br>A    | RAS-like_family_11_member_A                                                      |
| 33.699  | 8.218   | 2.035  | 4.47 x10 <sup>-06</sup> | ARRB1          | arrestin_beta_1                                                                  |
| 15.048  | 59.540  | -1.983 | 5.09 x10 <sup>-06</sup> | MB21D1         | Mab-21_domain_containing_1                                                       |
| 25.221  | 6.095   | 2.047  | 5.61 x10 <sup>-06</sup> | NRARP          | NOTCH-regulated_ankyrin_repeat_protein                                           |
| 20.664  | 80.385  | -1.959 | 5.85 x10 <sup>-06</sup> | IPCEF1         | interaction_protein_for_cytoshesin_exchange_factors_1                            |
| 15.207  | 59.486  | -1.967 | 6.01 x10 <sup>-06</sup> | ZBP1           | Z-DNA_binding_protein_1                                                          |
| 140.044 | 529.609 | -1.919 | 6.39 x10 <sup>-06</sup> | IFIH1          | interferon_induced_with_helicase_C_domain_1                                      |
| 16.531  | 64.003  | -1.952 | 6.86 x10 <sup>-06</sup> | AHRR           | aryl-hydrocarbon_receptor_repressor                                              |
| 95.111  | 356.266 | -1.905 | 7.53 x10 <sup>-06</sup> | PML            | promyelocytic_leukemia                                                           |
| 68.830  | 257.702 | -1.904 | 7.78 x10 <sup>-06</sup> | APOBEC<br>3A   | apolipoprotein_B_mRNA_editing_enzyme_catalytic_poly<br>peptide-like_3A           |
| 0       | 1.251   | -7.550 | 8.28 x10 <sup>-06</sup> | DFNB59         | deafness_autosomal_recessive_59                                                  |
| 0.900   | 5.115   | -2.496 | 8.34 x10 <sup>-06</sup> | IL1RL2         | interleukin_1_receptor-like_2                                                    |

|         |         |         |                         |             |                                                                    |
|---------|---------|---------|-------------------------|-------------|--------------------------------------------------------------------|
| 2.702   | 11.755  | -2.118  | 8.57 x10 <sup>-06</sup> | XIRP1       | xin_actin-binding_repeat_containing_1                              |
| 159.543 | 588.279 | -1.882  | 9.26 x10 <sup>-06</sup> | IFIT1       | interferon-induced_protein_with_tetratricopeptide_repeats_1        |
| 0.370   | 2.938   | -2.963  | 9.35 x10 <sup>-06</sup> | CCL18       | chemokine_(C-motif)_ligand_18_(pulmonary_and_activation-regulated) |
| 4.397   | 0.761   | 2.518   | 1.04 x10 <sup>-05</sup> | CD27-AS1    | CD27_antisense_RNA_1                                               |
| 386.063 | 1410.47 | -1.869  | 1.04 x10 <sup>-05</sup> | ISG15       | ISG15_ubiquitin-like_modifier                                      |
| 16.002  | 60.248  | -1.912  | 1.05 x10 <sup>-05</sup> | ADORA2A-AS1 | ADORA2A_antisense_RNA_1                                            |
| 1.642   | 7.782   | -2.239  | 1.13 x10 <sup>-05</sup> | C1QTNF1     | C1q_and_tumor_necrosis_factor_related_protein_1                    |
| 84.037  | 22.695  | 1.888   | 1.18 x10 <sup>-05</sup> | IL18        | interleukin_18_(interferon-gamma-inducing_factor)                  |
| 2.172   | 0.217   | 3.279   | 1.38 x10 <sup>-05</sup> | CLEC12B     | C-type_lectin_domain_family_12_member_B                            |
| 0.741   | 4.299   | -2.524  | 1.42 x10 <sup>-05</sup> | PRKAG2-AS1  | PRKAG2_antisense_RNA_1                                             |
| 23.579  | 85.937  | -1.865  | 1.45 x10 <sup>-05</sup> | APOL1       | apolipoprotein_L_1                                                 |
| 125.897 | 450.203 | -1.838  | 1.47 x10 <sup>-05</sup> | TRIM22      | tripartite_motif_containing_22                                     |
| 69.783  | 19.103  | 1.868   | 1.51 x10 <sup>-05</sup> | CPM         | carboxypeptidase_M                                                 |
| 183.441 | 51.213  | 1.840   | 1.54 x10 <sup>-05</sup> | GADD45A     | growth_arrest_and_DNA-damage-inducible_alpha                       |
| 1575.99 | 443.509 | 1.829   | 1.56 x10 <sup>-05</sup> | NEAT1       | nuclear_paraspeckle_assembly_transcript_1_(non-protein_coding)     |
| 3.285   | 13.388  | -2.0247 | 1.57 x10 <sup>-05</sup> | LAG3        | lymphocyte-activation_gene_3                                       |
| 0.052   | 1.469   | -4.628  | 1.58 x10 <sup>-05</sup> | PCDH17      | protocadherin_17                                                   |
|         |         |         |                         |             |                                                                    |

## B.

| Symbol      | Entrez Gene Name                                | Res    | LPS    | LPS + Res |
|-------------|-------------------------------------------------|--------|--------|-----------|
| CSF3        | colony stimulating factor 3                     | 4.059  | 14.018 | 15.135    |
| RHCG        | Rh family C glycoprotein                        |        | 11.507 | 11.372    |
| CLEC12A-AS1 | CLEC12A antisense RNA 1                         | 4.059  | 11.252 | 10.482    |
| FRMD7       | FERM domain containing 7                        |        | 10.739 | 10.655    |
| CFAP58-DT   | CFAP58 divergent transcript                     | 4.059  | 10.449 | 10.067    |
| IL6         | interleukin 6                                   | -0.095 | 9.67   | 10.139    |
| IL12B       | interleukin 12B                                 |        | 9.513  | 8.337     |
| RANBP3L     | RAN binding protein 3 like                      |        | 9.222  | 7.134     |
| TMEM54      | transmembrane protein 54                        |        | 9.063  | 6.598     |
| IL1A        | interleukin 1 alpha                             | -1.366 | 8.788  | 8.899     |
| ANO5        | anoctamin 5                                     | 4.614  | 8.742  | 8.337     |
| CCL20       | C-C motif chemokine ligand 20                   | 0.641  | 8.674  | 9.215     |
| KCNJ2-AS1   | KCNJ2 antisense RNA 1                           | 2.13   | 8.637  | 8.949     |
| IDO2        | indoleamine 2,3-dioxygenase 2                   |        | 8.616  | 6.836     |
| HPN         | hepsin                                          | 4.614  | 8.583  | 10.892    |
| IFNB1       | interferon beta 1                               |        | 8.443  | 7.453     |
| TSLP        | thymic stromal lymphopoietin                    | 5.015  | 8.405  | 8.216     |
| MAS1        | MAS1 proto-oncogene, G protein-coupled receptor | 4.614  | 8.113  | 6.942     |
| FGF13       | fibroblast growth factor 13                     |        | 8.065  | 5.478     |
| MMP10       | matrix metalloproteinase 10                     |        | 8.065  | 8.449     |
| NBEAP1      | neurobeachin pseudogene 1                       | 5.015  | 7.914  | 5.478     |

|               |                                                           |        |       |        |
|---------------|-----------------------------------------------------------|--------|-------|--------|
| TNFSF18       | TNF superfamily member 18                                 |        | 7.745 | 5.478  |
| INHBA         | inhibin subunit beta A                                    | -0.476 | 7.711 | 5.3    |
| NR5A2         | nuclear receptor subfamily 5 group A member 2             | 5.015  | 7.684 | 7.22   |
| ADCY10        | adenylate cyclase 10                                      | 5.803  | 7.684 | 7.774  |
| F3            | coagulation factor III, tissue factor                     | -0.819 | 7.579 | 6.457  |
| C2CD4B        | C2 calcium dependent domain containing 4B                 | 5.015  | 7.553 | 10.428 |
| ACOD1         | aconitate decarboxylase 1                                 | 0.789  | 7.546 | 8.656  |
| MAFF          | nuclear receptor binding factor 2 pseudogene 2            |        | 7.483 | 5.478  |
| TCP10/TCP10L2 | t-complex 10                                              |        | 7.483 | 5.954  |
| ADAD2         | adenosine deaminase domain containing 2                   | 3.143  | 7.483 | 6.462  |
| IGHV1-3       | immunoglobulin heavy variable 1-3                         | 5.328  | 7.483 | 6.462  |
| MIR3945HG     | MIR3945 host gene                                         | -1.143 | 7.453 | 5.923  |
| ABCA13        | ATP binding cassette subfamily A member 13                | 3.143  | 7.41  | 5.736  |
| XIAPP3        | X-linked inhibitor of apoptosis pseudogene 3              |        | 7.41  | 8.036  |
| TMEM26        | transmembrane protein 26                                  |        | 7.332 | 5.164  |
| BHLHE22       | basic helix-loop-helix family member e22                  | 3.143  | 7.332 |        |
| IL1B          | interleukin 1 beta                                        | -0.956 | 7.304 | 7.467  |
| ACAN          | aggrecan                                                  | 4.059  | 7.25  | 6.942  |
| HSPE1P4       | heat shock protein family E (Hsp10) member 1 pseudogene 4 |        | 7.163 | 5.954  |
| PTGS2, COX2   | prostaglandin-endoperoxide synthase 2                     | -0.541 | 7.018 | 7.396  |
| SERPINB7      | serpin family B member 7                                  |        | 6.972 | 5.478  |
| TEX41         | testis expressed 41                                       |        | 6.972 | 5.478  |
| RPL23AP93     | ribosomal protein L23a pseudogene 93                      |        | 6.972 | 6.722  |
| DNAAF1        | dynein axonemal assembly factor 1                         | 0.045  | 6.93  | 5.969  |
| HSD11B1       | hydroxysteroid 11-beta dehydrogenase 1                    |        | 6.866 | 6.311  |
| TMEM139       | transmembrane protein 139                                 | 5.328  | 6.752 | 5.164  |
| CKMT2         | creatine kinase, mitochondrial 2                          | 4.614  | 6.752 | 5.478  |
| CCDC116       | coiled-coil domain containing 116                         | 5.992  | 6.752 | 6.942  |
| TNFAIP6       | TNF alpha induced protein 6                               | 0.801  | 6.695 | 7.742  |

### C.

| Symbol        | Entrez Gene Name                                      | Res    | LPS    | LPS + Res |
|---------------|-------------------------------------------------------|--------|--------|-----------|
| DMBX1         | diencephalon/mesencephalon homeobox 1                 | -5.645 | -5.479 | -5.504    |
| LINC01013     | long intergenic non-protein coding RNA 1013           | -5.645 | -5.479 | -5.504    |
| ZNRF2P1       | zinc and ring finger 2 pseudogene 1                   | 0.514  | -5.479 | -5.504    |
| UTS2          | urotensin 2                                           | -1.587 | -5.479 | -5.504    |
| TNFRSF17      | TNF receptor superfamily member 17                    | -2.503 | -5.479 | -5.504    |
| BRCC3P1       | BRCA1/BRCA2-containing complex subunit 3 pseudogene 1 | -0.631 | -5.479 | -5.504    |
| TRAJ14        | T cell receptor alpha joining 14                      | -0.061 | -5.479 | -5.504    |
| TMC3-AS1      | TMC3 antisense RNA 1                                  | -2.503 | -5.479 | -5.504    |
| LINC01629     | long intergenic non-protein coding RNA 1629           | 0.197  | -5.223 | -5.247    |
| GDF6          | growth differentiation factor 6                       | -5.388 | -5.223 | -5.247    |
| CA8           | carbonic anhydrase 8                                  | -5.388 | -5.223 | -5.247    |
| ELOVL3        | ELOVL fatty acid elongase 3                           | -0.774 | -5.223 | -5.247    |
| DKFZp779M0652 | uncharacterized DKFZp779M0652                         | -0.373 | -5.223 | -5.247    |
| CD163L1       | CD163 molecule like 1                                 | 0.415  | -5.223 | -5.247    |
| KLC3          | kinesin light chain 3                                 | 0.604  | -5.223 | -5.247    |
| UVRAG-DT      | UVRAG divergent transcript                            | -5.388 | -5.223 | -5.247    |



|                 |                                            |        |        |        |
|-----------------|--------------------------------------------|--------|--------|--------|
| IQCJ-SCHIP1-AS1 | IQCJ-SCHIP1 read through antisense RNA 1   | -5.388 | -5.223 | -5.247 |
| LINC00520       | long intergenic non-protein coding RNA 520 | -5.388 | -5.223 | -5.247 |
| DNMT3L          | DNA methyltransferase 3 like               | -5.388 | -5.223 | -5.247 |
| PRRG2           | proline rich and Gla domain 2              | 0.415  | -5.223 | -5.247 |
| GRM4            | glutamate metabotropic receptor 4          | -5.388 | -5.223 | -5.247 |
| METTL24         | methyltransferase like 24                  | -5.388 | -5.223 | -5.247 |
| RPL26P27        | ribosomal protein L26 pseudogene 27        | 0.604  | -5.223 | -5.247 |
| PGM5            | phosphoglucomutase 5                       | -0.061 | -5.479 | -2.224 |
| ANKRD33         | ankyrin repeat domain 33                   | -1.031 | -5.479 | -2.224 |
| RBP4            | retinol binding protein 4                  | -1.587 | -5.479 | -2.224 |
| TEX21P          | testis expressed 21, pseudogene            | -0.318 | -5.479 | -2.224 |

\*These data represent the genes that are downregulated by LPS and not modulated (genes downregulated/upregulated) by resveratrol, except for the last four, in PBMCs (incubated for 3h). RNAs were extracted and subjected to RNAseq analysis. This data has been obtained by using the DEG program.

\*\*These data represent the genes that are not greatly modulated (genes downregulated/upregulated) by resveratrol + LPS as compared to LPS alone in PBMCs (incubated for 3h). RNAs were extracted and subjected to RNAseq analysis. This data has been obtained by using the DEG program. The log2 ratios were imported into the Ingenuity Pathways Analysis. These numbers represent the z scores for the genes.

**TABLE S3. (A) GENES MODULATED BY LEC10 ALONE\*. (B) GENES NOT UPREGULATED BY LEC10 TO THE SAME EXTENT AS LPS\*. (C) GENES THAT ARE UPREGULATED BY LPS, LEC10, LEC10 + LPS, LEC50 AND LEC50 + LPS\*\*. (D) GENES DOWNREGULATED BY LPS AND LECTINS\*\*.**

**A.**

| LEC10    | control1 | Log2 Fold | P value                 | Gene Name   | Gene Description                                                                      |
|----------|----------|-----------|-------------------------|-------------|---------------------------------------------------------------------------------------|
| 1105.12  | 2.180    | 8.980     | 1.96 x10 <sup>-51</sup> | IL6         | interleukin_6_(interferon_beta_2)                                                     |
| 1116.645 | 2.824    | 8.623     | 2.62 x10 <sup>-49</sup> | IL1A        | interleukin_1_alpha                                                                   |
| 2159.807 | 7.532    | 8.162     | 3.34 x10 <sup>-47</sup> | CCL4        | chemokine_(C-C_motif)_ligand_4                                                        |
| 226.943  | 0.446    | 8.969     | 5.46 x10 <sup>-45</sup> | CCL3L1      | chemokine_(C-C_motif)_ligand_3-like_1                                                 |
| 77.794   | 0        | 13.49     | 1.22 x10 <sup>-40</sup> | CSF3        | colony_stimulating_factor_3_(granulocyte)                                             |
| 19385.16 | 146.59   | 7.046     | 8.24 x10 <sup>-40</sup> | IL1B        | interleukin_1_beta                                                                    |
| 199.06   | 0.941    | 7.713     | 2.26 x10 <sup>-39</sup> | CCL20       | chemokine_(C-C_motif)_ligand_20                                                       |
| 488.089  | 3.270    | 7.218     | 3.70 x10 <sup>-39</sup> | F3          | coagulation_factor_III_(thromboplastin_tissue_factor)                                 |
| 2886.299 | 31.916   | 6.498     | 1.50 x10 <sup>-35</sup> | PTGS2, COX2 | Prostaglandin-endoperoxide_synthase_2_(prostaglandin_G/H_synthase_and_cyclooxygenase) |
| 178.034  | 1.784    | 6.635     | 1.10 x10 <sup>-33</sup> | IRG1        | immunoresponsive_1_homolog_(mouse)                                                    |
| 128.475  | 1.139    | 6.808     | 2.52 x10 <sup>-33</sup> | CCL3        | chemokine_(C-C_motif)_ligand_3                                                        |
| 120.973  | 1.139    | 6.721     | 1.07 x10 <sup>-32</sup> | KCNJ2       | potassium_inwardly-rectifying_channel_subfamily_J_member_2                            |
| 240.234  | 2.973    | 6.332     | 1.47 x10 <sup>-32</sup> | INHBA       | inhibin_beta_A                                                                        |
| 546.862  | 7.681    | 6.152     | 2.16 x10 <sup>-32</sup> | TNFAIP6     | tumor_necrosis_factor_alpha-induced_protein_6                                         |
| 692.586  | 10.159   | 6.090     | 4.05 x10 <sup>-32</sup> | CXCL1       | chemokine_(C-X-C_motif)_ligand_1_(melanoma_growth_stimulating_activity_alpha)         |
| 30.479   | 0.049    | 9.080     | 7.20 x10 <sup>-31</sup> | CCL4L2      | chemokine_(C-C_motif)_ligand_4-like_2                                                 |
| 20.792   | 0.049    | 8.529     | 5.16 x10 <sup>-27</sup> | KCNJ2-AS1   | KCNJ2_antisense_RNA_1_(head_to_head)                                                  |
| 43.770   | 0.644    | 6.071     | 4.23 x10 <sup>-26</sup> | DNAAF1      | dynein_axonemal_assembly_factor_1                                                     |

|          |          |       |                         |              |                                                                                             |
|----------|----------|-------|-------------------------|--------------|---------------------------------------------------------------------------------------------|
| 54.343   | 1.288    | 5.391 | 7.87 x10 <sup>-24</sup> | TNIP3        | TNFAIP3_interacting_protein_3                                                               |
| 26.226   | 0.346    | 6.212 | 9.88 x10 <sup>-24</sup> | CSF2         | colony_stimulating_factor_2_(granulocyte-macrophage)                                        |
| 439.770  | 15.065   | 4.866 | 1.58 x10 <sup>-23</sup> | TNF          | tumor_necrosis_factor                                                                       |
| 2759.83  | 109.77   | 4.651 | 1.99 x10 <sup>-22</sup> | CXCL2        | chemokine_(C-X-C_motif)_ligand_2                                                            |
| 2523.37  | 105.21   | 4.583 | 5.92 x10 <sup>-22</sup> | CXCL3        | chemokine_(C-X-C_motif)_ligand_3                                                            |
| 50.917   | 1.932    | 4.714 | 3.29 x10 <sup>-20</sup> | ADORA2A      | adenosine_A2a_receptor                                                                      |
| 32.960   | 1.189    | 4.784 | 1.64 x10 <sup>-19</sup> | IL7          | interleukin_7                                                                               |
| 12.109   | 0.148    | 6.284 | 1.99 x10 <sup>-19</sup> | C1QTNF1      | C1q_and_tumor_necrosis_factor_related_protein_1                                             |
| 40.462   | 1.685    | 4.580 | 7.24 x10 <sup>-19</sup> | ADORA2A-AS1  | ADORA2A_antisense_RNA_1                                                                     |
| 278.038  | 18.584   | 3.902 | 4.97 x10 <sup>-17</sup> | GJB2         | gap_junction_protein_beta_2_26kDa                                                           |
| 435.162  | 30.825   | 3.819 | 1.31 x10 <sup>-16</sup> | RIN2         | Ras_and_Rab_interactor_2                                                                    |
| 14.471   | 0.594    | 4.589 | 6.57 x10 <sup>-16</sup> | SYNPO2       | synaptopodin_2                                                                              |
| 6.202    | 0        | 9.848 | 6.77 x10 <sup>-16</sup> | CCDC147-AS1  | CCDC147_antisense_RNA_1_(head_to_head)                                                      |
| 6.143    | 0        | 9.834 | 7.99 x10 <sup>-16</sup> | FRMD7        | FERM_domain_containing_7                                                                    |
| 29.062   | 1.685    | 4.102 | 9.20 x10 <sup>-16</sup> | UPB1         | ureidopropionase_beta                                                                       |
| 7.974    | 0.148    | 5.682 | 1.10 x10 <sup>-15</sup> | IL21-AS1     | IL21_antisense_RNA_1                                                                        |
| 13.999   | 0.594    | 4.541 | 1.23 x10 <sup>-15</sup> | ZP3          | zona_pellucida_glycoprotein_3_(sperm_receptor)                                              |
| 16.657   | 0.792    | 4.381 | 1.58 x10 <sup>-15</sup> | FLT1         | fms-related_tyrosine_kinase_1                                                               |
| 3340.246 | 272.525  | 3.615 | 1.85 x10 <sup>-15</sup> | SERPINB2     | serpin_peptidase_inhibitor_clade_B_(ovalbumin)_member_2                                     |
| 38.572   | 2.626    | 3.872 | 3.03 x10 <sup>-15</sup> | PDSS1        | prenyl_(decaprenyl)_diphosphate_synthase_subunit1                                           |
| 8.210    | 0.198    | 5.325 | 4.05 x10 <sup>-15</sup> | IL36G        | interleukin_36_gamma                                                                        |
| 30181.18 | 2646.306 | 3.511 | 8.38 x10 <sup>-15</sup> | IL8          | interleukin_8                                                                               |
| 8.801    | 0.297    | 4.856 | 2.69 x10 <sup>-14</sup> | CASP5        | caspase_5_apoptosis-related_cysteine_peptidase                                              |
| 3196.295 | 297.998  | 3.423 | 3.11 x10 <sup>-14</sup> | EREG         | epiregulin                                                                                  |
| 20.142   | 1.338    | 3.905 | 3.99 x10 <sup>-14</sup> | FFAR2        | free_fatty_acid_receptor_2                                                                  |
| 21.442   | 1.486    | 3.844 | 6.12 x10 <sup>-14</sup> | PLD1         | phospholipase_D1_phosphatidylcholine-specific_dehydrogenase/reductase_(SDR_family)_member_9 |
| 4.489    | 50.897   | 3.501 | 1.72 x10 <sup>-13</sup> | DHRS9        | interferon-induced_protein_with_tetratricopeptide_repeats_1                                 |
| 167.165  | 16.651   | 3.327 | 2.48 x10 <sup>-13</sup> | IFIT1        | interferon-induced_protein_with_tetratricopeptide_repeats_1                                 |
| 494.409  | 51.244   | 3.270 | 3.12 x10 <sup>-13</sup> | BCL2A1       | BCL2-related_protein_A1                                                                     |
| 4.252    | 0        | 9.304 | 6.26 x10 <sup>-13</sup> | RHCG         | Rh_family_C_glycoprotein                                                                    |
| 1013.096 | 109.723  | 3.206 | 7.13 x10 <sup>-13</sup> | NFKBIZ       | nuclear_factor_of_kappa_light_polypeptide_gene_enhancer_in_B-cells_inhibitor_zeta           |
| 44.715   | 4.311    | 3.372 | 8.39 x10 <sup>-13</sup> | CD274        | CD274_molecule                                                                              |
| 9.982    | 0.594    | 4.053 | 9.45 x10 <sup>-13</sup> | C1orf61      | chromosome_1_open_reading_frame_61                                                          |
| 1006.126 | 111.260  | 3.176 | 1.09 x10 <sup>-12</sup> | IFIT3        | interferon-induced_protein_with_tetratricopeptide_repeats_3                                 |
| 62.495   | 6.343    | 3.299 | 1.16 x10 <sup>-12</sup> | hsa-mir-146a | hsa-mir-146a                                                                                |
| 659.862  | 74.437   | 3.147 | 1.68 x10 <sup>-12</sup> | G0S2         | G0/G1switch_2                                                                               |
| 758.803  | 87.323   | 3.119 | 2.47 x10 <sup>-12</sup> | NLRP3        | NLR_family_pyrin_domain_containing_3                                                        |
| 4.607    | 0.049    | 6.356 | 2.91 x10 <sup>-12</sup> | ZNF259P1     | zinc_finger_protein_259_pseudogene_1                                                        |

|          |         |       |                         |                      |                                                                                                      |
|----------|---------|-------|-------------------------|----------------------|------------------------------------------------------------------------------------------------------|
| 6.852    | 0.297   | 4.495 | 2.94 x10 <sup>-12</sup> | SLC9A7<br>P1         | solute_carrier_family_9_subfamily_A_(NHE7_cati<br>on_proton_antipporter_7)_member_7_pseudogene<br>_1 |
| 107.269  | 11.943  | 3.166 | 3.06 x10 <sup>-12</sup> | ITGB8                | integrin_beta_8                                                                                      |
| 1728.247 | 203.043 | 3.089 | 3.57 x10 <sup>-12</sup> | ACSL1                | acyl-CoA_synthetase_long-<br>chain_family_member_1                                                   |
| 122.982  | 14.173  | 3.116 | 5.18 x10 <sup>-12</sup> | MIR155<br>HG         | MIR155_host_gene_(non-protein_coding)                                                                |
| 14.176   | 1.139   | 3.628 | 6.36 x10 <sup>-12</sup> | GBP1P<br>1           | guanylate_binding_protein_1_interferon-<br>inducible_pseudogene_1                                    |
| 10.278   | 0.743   | 3.777 | 8.84 x10 <sup>-12</sup> | PNPLA1               | patatin-like_phospholipase_domain_containing_1                                                       |
| 14.5901  | 1.288   | 3.494 | 1.18 x10 <sup>-11</sup> | STEAP4               | STEAP_family_member_4                                                                                |
| 9.155729 | 0.644   | 3.815 | 1.33 x10 <sup>-11</sup> | CDK1                 | cyclin-dependent_kinase_1                                                                            |
| 147.1414 | 18.634  | 2.980 | 2.81 x10 <sup>-11</sup> | KANK1                | KN_motif_and_ankyrin_repeat_domains_1                                                                |
| 156.179  | 19.873  | 2.973 | 2.99 x10 <sup>-11</sup> | CLEC4<br>E           | C-type_lectin_domain_family_4_member_E                                                               |
| 3.957    | 0.049   | 6.137 | 3.78 x10 <sup>-11</sup> | CCL4L1               | chemokine_(C-C_motif)_ligand_4-like_1                                                                |
| 170.946  | 22.450  | 2.928 | 5.01 x10 <sup>-11</sup> | CMPK2                | cytidine_monophosphate_(UMP-<br>CMP)_kinase_2_mitochondrial                                          |
| 16.716   | 1.685   | 3.305 | 5.49 x10 <sup>-11</sup> | SCN1B                | sodium_channel_voltage-<br>gated_type_I_beta_subunit                                                 |
| 857.980  | 118.148 | 2.860 | 8.22 x10 <sup>-11</sup> | IFIT2                | interferon-<br>induced_protein_with_tetratricopeptide_repeats_2                                      |
| 5.198    | 0.247   | 4.353 | 9.54 x10 <sup>-11</sup> | ABCA6<br>RNF144<br>B | ATP-binding_cassette_sub-<br>family_A_(ABC1)_member_6                                                |
| 282.646  | 38.903  | 2.860 | 1.01 x10 <sup>-10</sup> | IL1RN                | ring_finger_protein_144B                                                                             |
| 1107.666 | 154.574 | 2.841 | 1.05 x10 <sup>-10</sup> | IL1RN                | interleukin_1_receptor_antagonist                                                                    |
| 0.945    | 10.803  | -3.50 | 1.28 x10 <sup>-10</sup> | PDK4                 | pyruvate_dehydrogenase_kinase_isozyme_4                                                              |
| 384.599  | 54.217  | 2.826 | 1.38 x10 <sup>-10</sup> | ISG15                | ISG15_ubiquitin-like_modifier                                                                        |
| 53.752   | 7.186   | 2.901 | 1.83 x10 <sup>-10</sup> | MFSD2<br>A           | major_facilitator_superfamily_domain_containing_<br>2A                                               |
| 14.471   | 1.536   | 3.230 | 1.86 x10 <sup>-10</sup> | ELOVL7               | ELOVL_fatty_acid_elongase_7                                                                          |
| 560.389  | 80.979  | 2.790 | 2.12 x10 <sup>-10</sup> | ETS2                 | ets_erythroblastosis_virus_E26_oncogene_homol<br>og_2_(avian)                                        |
| 96.696   | 13.480  | 2.842 | 2.25 x10 <sup>-10</sup> | CXCL10               | chemokine_(C-X-C_motif)_ligand_10                                                                    |
| 170.355  | 24.531  | 2.795 | 2.84 x10 <sup>-10</sup> | CXCL5                | chemokine_(C-X-C_motif)_ligand_5                                                                     |
| 314.543  | 46.089  | 2.770 | 3.18 x10 <sup>-10</sup> | DRAM1                | DNA-damage_regulated_autophagy_modulator_1                                                           |
| 126.821  | 18.535  | 2.774 | 4.29 x10 <sup>-10</sup> | XAF1                 | XIAP_associated_factor_1                                                                             |
| 7.442    | 0.594   | 3.630 | 4.91 x10 <sup>-10</sup> | CXCL11               | chemokine_(C-X-C_motif)_ligand_11                                                                    |
| 965.663  | 151.997 | 2.667 | 1.01 x10 <sup>-09</sup> | SOCS3                | suppressor_of_cytokine_signaling_3                                                                   |
| 7.501    | 0.693   | 3.421 | 1.02 x10 <sup>-09</sup> | E2F7                 | E2F_transcription_factor_7                                                                           |
| 907.126  | 144.316 | 2.652 | 1.23 x10 <sup>-09</sup> | SLC39A<br>8          | solute_carrier_family_39_(zinc_transporter)_mem<br>ber8                                              |
| 135.682  | 21.211  | 2.676 | 1.36 x10 <sup>-09</sup> | IFIT5                | interferon-<br>induced_protein_with_tetratricopeptide_repeats_5                                      |
| 40.462   | 5.996   | 2.753 | 1.59 x10 <sup>-09</sup> | PDGFB                | platelet-derived_growth_factor_beta_polypeptide                                                      |
| 4.312    | 0.247   | 4.084 | 1.91 x10 <sup>-09</sup> | INHBA-<br>AS1        | INHBA_antisense_RNA_1                                                                                |
| 3.485    | 0.148   | 4.489 | 1.93 x10 <sup>-09</sup> | OR2B11               | olfactory_receptor_family_2_subfamily_B_membe<br>r_11                                                |
| 505.455  | 82.714  | 2.611 | 2.15 x10 <sup>-09</sup> | SLAMF<br>7           | SLAM_family_member_7                                                                                 |
| 5.670    | 0.446   | 3.648 | 2.85 x10 <sup>-09</sup> | EDN1                 | endothelin_1                                                                                         |



|          |          |       |                         |            |                                                                                                         |
|----------|----------|-------|-------------------------|------------|---------------------------------------------------------------------------------------------------------|
| 31.602   | 4.807    | 2.715 | 3.62 x10 <sup>-09</sup> | WNT5A      | wingless-type_MMTV_integration_site_family_member_5A                                                    |
| 12225.97 | 2086.338 | 2.550 | 4.23 x10 <sup>-09</sup> | SOD2       | superoxide_dismutase_2_mitochondrial                                                                    |
| 492.991  | 84.002   | 2.553 | 4.47 x10 <sup>-09</sup> | GCH1       | GTP_cyclohydrolase_1                                                                                    |
| 65.035   | 10.655   | 2.608 | 4.95 x10 <sup>-09</sup> | AK4        | adenylate_kinase_4                                                                                      |
| 19.256   | 2.775    | 2.791 | 5.42 x10 <sup>-09</sup> | MRPS24     | mitochondrial_ribosomal_protein_S24                                                                     |
| 1571.064 | 274.210  | 2.518 | 6.49 x10 <sup>-09</sup> | PLAUR      | plasminogen_activator_urokinase_receptor                                                                |
| 11.636   | 69.779   | -2.58 | 7.17 x10 <sup>-09</sup> | C5AR2      | complement_component_5a_receptor_2                                                                      |
| 22.210   | 3.370    | 2.717 | 7.90 x10 <sup>-09</sup> | LAMP3      | lysosomal-associated_membrane_protein_3                                                                 |
| 4.961    | 0.396    | 3.623 | 8.37 x10 <sup>-09</sup> | LINC00346  | long_intergenic_non-protein_coding_RNA_346                                                              |
| 14.058   | 1.982    | 2.821 | 9.35 x10 <sup>-09</sup> | CD80       | CD80_molecule                                                                                           |
| 2.244    | 0        | 8.384 | 1.09 x10 <sup>-08</sup> | IL12B      | interleukin_12B_(natural_killer_cell_stimulatory_factor_2_cytotoxic_lymphocyte_maturation_factor_2_p40) |
| 70.705   | 12.191   | 2.535 | 1.15 x10 <sup>-08</sup> | OAS1       | 2'-5'-oligoadenylate_synthetase_1_40/46kDa                                                              |
| 54.107   | 298.296  | -2.46 | 1.45 x10 <sup>-08</sup> | CEBPD      | CCAAT/enhancer_binding_protein_(C/EBP)_delta                                                            |
| 216.784  | 39.300   | 2.463 | 1.60 x10 <sup>-08</sup> | HS3ST3B1   | heparan_sulfate_(glucosamine)_3-O-sulfotransferase_3B1                                                  |
| 4.371    | 0.346    | 3.629 | 2.01 x10 <sup>-08</sup> | EHF        | ets_homologous_factor                                                                                   |
| 2.126    | 0        | 8.306 | 2.10 x10 <sup>-08</sup> | IDO2       | indoleamine_23-dioxygenase_2                                                                            |
| 52.926   | 284.072  | -2.42 | 2.33 x10 <sup>-08</sup> | HMOX1      | heme_oxygenase_(decycling)_1                                                                            |
| 6.674    | 38.556   | -2.52 | 2.50 x10 <sup>-08</sup> | SERPINE1   | serpin_peptidase_inhibitor_clade_E_(nexin_plasminogen_activator_inhibitor_type_1)_member_1              |
| 11.164   | 1.585    | 2.810 | 2.61 x10 <sup>-08</sup> | AP003733.1 | Uncharacterized_protein;_cDNA_FLJ36460_fis_clone_THYMU2014801                                           |
| 563.106  | 106.254  | 2.405 | 2.68 x10 <sup>-08</sup> | SLC2A6     | solute_carrier_family_2_(facilitated_glucose_transporter)_member_6                                      |
| 7.324    | 0.892    | 3.028 | 2.71 x10 <sup>-08</sup> | HS3ST3A1   | heparan_sulfate_(glucosamine)_3-O-sulfotransferase_3A1                                                  |
| 4.489    | 26.761   | -2.57 | 3.01 x10 <sup>-08</sup> | SDS        | serine_dehydratase                                                                                      |
| 416.615  | 79.344   | 2.392 | 3.22 x10 <sup>-08</sup> | GBP1       | guanylate_binding_protein_1_interferon-inducible                                                        |
| 3.248    | 0.198    | 3.989 | 3.42 x10 <sup>-08</sup> | GCKR       | glucokinase_(hexokinase_4)_regulator                                                                    |
| 13.113   | 2.031    | 2.686 | 4.17 x10 <sup>-08</sup> | C11orf96   | chromosome_11_open_reading_frame_96                                                                     |
| 191.325  | 36.921   | 2.373 | 4.81 x10 <sup>-08</sup> | OAS3       | 2'-5'-oligoadenylate_synthetase_3_100kDa                                                                |
| 6.852    | 37.912   | -2.46 | 4.85 x10 <sup>-08</sup> | CDH6       | cadherin_6_type_2_K-cadherin_(fetal_kidney)                                                             |
| 63.558   | 12.042   | 2.399 | 5.77 x10 <sup>-08</sup> | TRIP10     | thyroid_hormone_receptor_interactor_10                                                                  |
| 317.851  | 62.543   | 2.345 | 5.78 x10 <sup>-08</sup> | MX1        | myxovirus_(influenza_virus)_resistance_1_interferon-inducible_protein_p78_(mouse)                       |
| 1413.054 | 279.711  | 2.336 | 5.88 x10 <sup>-08</sup> | IER3       | immediate_early_response_3                                                                              |
| 9.746    | 1.437    | 2.755 | 6.74 x10 <sup>-08</sup> | C12orf61   | chromosome_12_open_reading_frame_61                                                                     |
| 350.989  | 70.274   | 2.320 | 7.69 x10 <sup>-08</sup> | CLIC4      | chloride_intracellular_channel_4                                                                        |
| 15.062   | 2.527    | 2.572 | 7.81 x10 <sup>-08</sup> | TEX14      | testis_expressed_14                                                                                     |
| 3.662    | 0.297    | 3.592 | 8.40 x10 <sup>-08</sup> | AL135998.  | Uncharacterized_protein_                                                                                |
| 94.215   | 18.683   | 2.333 | 9.70 x10 <sup>-08</sup> | ADCY9      | adenylate_cyclase_9                                                                                     |
| 3.603    | 0.297    | 3.569 | 1.04 x10 <sup>-07</sup> | CARD17     | caspase_recruitment_domain_family_member_17                                                             |
| 254.411  | 51.987   | 2.290 | 1.12 x10 <sup>-07</sup> | MMP14      | matrix_metallopeptidase_14_(membrane-inserted)                                                          |

|          |         |       |                         |           |                                                                                                         |
|----------|---------|-------|-------------------------|-----------|---------------------------------------------------------------------------------------------------------|
| 48.850   | 9.564   | 2.351 | 1.18 x10 <sup>-07</sup> | IL15RA    | interleukin_15_receptor_alpha                                                                           |
| 449.457  | 92.625  | 2.278 | 1.22 x10 <sup>-07</sup> | HELZ2     | helicase_with_zinc_finger_2_transcriptional_coactivator                                                 |
| 1101.818 | 228.021 | 2.272 | 1.26 x10 <sup>-07</sup> | TRAF1     | TNF_receptor-associated_factor_1                                                                        |
| 602.092  | 125.037 | 2.267 | 1.37 x10 <sup>-07</sup> | ICAM1     | intercellular_adhesion_molecule_1                                                                       |
| 66.275   | 13.380  | 2.307 | 1.59 x10 <sup>-07</sup> | KMO       | kynurenine_3-monooxygenase_(kynurenine_3-hydroxylase)                                                   |
| 35.264   | 170.185 | 2.270 | 1.63 x10 <sup>-07</sup> | FUCA1     | fucosidase_alpha-L-_1_tissue                                                                            |
| 41.880   | 8.325   | 2.329 | 1.72 x10 <sup>-07</sup> | SFR1      | SWI5-dependent_recombination_repair_1                                                                   |
| 192.624  | 40.192  | 2.260 | 1.74 x10 <sup>-07</sup> | CCRL2     | chemokine_(C-C_motif)_receptor-like_2                                                                   |
| 4.193    | 22.252  | -2.40 | 2.10 x10 <sup>-07</sup> | IFI30     | interferon_gamma-inducible_protein_30                                                                   |
| 8.269    | 1.288   | 2.675 | 2.13 x10 <sup>-07</sup> | MGAM      | maltase-glucoamylase_(alpha-glucosidase)                                                                |
| 294.991  | 63.683  | 2.211 | 2.75 x10 <sup>-07</sup> | RSAD2     | radical_S-adenosyl_methionine_domain_containing_2                                                       |
| 3.603    | 0.346   | 3.351 | 3.24 x10 <sup>-07</sup> | PPP1R17   | protein_phosphatase_1_regulatory_subunit_17                                                             |
| 1.713    | 0       | 7.995 | 3.48 x10 <sup>-07</sup> | FGF13     | fibroblast_growth_factor_13                                                                             |
| 212.176  | 46.337  | 2.194 | 3.61 x10 <sup>-07</sup> | ID2       | inhibitor_of_DNA_binding_2_dominant_negative_helix-loop-helix_protein                                   |
| 1.594    | 9.664   | -2.59 | 3.68 x10 <sup>-07</sup> | NLRC4     | NLR_family_CARD_domain_containing_4                                                                     |
| 6.674    | 0.991   | 2.743 | 3.83 x10 <sup>-07</sup> | CHAC1     | ChaC_cation_transport_regulator_homolog_1_(E._coli)                                                     |
| 173.427  | 37.962  | 2.191 | 3.89 x10 <sup>-07</sup> | ARL5B     | ADP-ribosylation_factor-like_5B                                                                         |
| 2.008    | 0.049   | 5.161 | 4.78 x10 <sup>-07</sup> | TNFSF15   | tumor_necrosis_factor_(ligand)_superfamily_member_15                                                    |
| 330.492  | 74.090  | 2.157 | 5.02 x10 <sup>-07</sup> | OAS2      | 2'-5'-oligoadenylate_synthetase_2_69/71kDa                                                              |
| 102.485  | 22.747  | 2.171 | 5.71 x10 <sup>-07</sup> | SAV1      | salvador_homolog_1_(Drosophila)                                                                         |
| 4.016    | 20.071  | -2.31 | 6.12 x10 <sup>-07</sup> | A4GALT    | alpha_14-galactosyltransferase                                                                          |
| 2.303    | 0.148   | 3.894 | 6.40 x10 <sup>-07</sup> | CCL23     | chemokine_(C-C_motif)_ligand_23                                                                         |
| 950.246  | 218.605 | 2.119 | 7.18 x10 <sup>-07</sup> | PELI1     | pellino_E3_ubiquitin_protein_ligase_1                                                                   |
| 1.594    | 0       | 7.893 | 7.40 x10 <sup>-07</sup> | LINC00158 | long_intergenic_non-protein_coding_RNA_158                                                              |
| 1.594    | 0       | 7.893 | 7.40 x10 <sup>-07</sup> | DAPK1-IT1 | DAPK1_intronic_transcript_1_(non-protein_coding)                                                        |
| 20.910   | 4.361   | 2.259 | 8.42 x10 <sup>-07</sup> | BRE       | brain_and_reproductiveorgan-expressed_(TNFRSF1A_modulator)                                              |
| 6.556    | 1.040   | 2.647 | 8.45 x10 <sup>-07</sup> | IL19      | interleukin_19                                                                                          |
| 0.945    | 6.194   | -2.70 | 1.02 x10 <sup>-06</sup> | GPR162    | G_protein-coupled_receptor_162                                                                          |
| 2.185    | 0.148   | 3.818 | 1.16 x10 <sup>-06</sup> | LINC00515 | long_intergenic_non-protein_coding_RNA_515                                                              |
| 13.231   | 2.676   | 2.302 | 1.38 x10 <sup>-06</sup> | TLR7      | toll-like_receptor_7                                                                                    |
| 0.295    | 3.171   | -3.39 | 1.46 x10 <sup>-06</sup> | PVRL4     | poliovirus_receptor-related_4                                                                           |
| 1.476    | 0       | 7.782 | 1.61 x10 <sup>-06</sup> | C2CD4B    | C2_calcium-dependent_domain_containing_4B                                                               |
| 4.430    | 0.594   | 2.883 | 1.64 x10 <sup>-06</sup> | BCL2L14   | BCL2-like_14_(apoptosis_facilitator)                                                                    |
| 0.708    | 5.055   | 2.822 | 1.66 x10 <sup>-06</sup> | PTGFRN    | prostaglandin_F2_receptor_inhibitor                                                                     |
| 1.831    | 0.049   | 5.028 | 1.83 x10 <sup>-06</sup> | IL12A     | interleukin_12A_(natural_killer_cell_stimulatory_factor_1_cytotoxic_lymphocyte_maturation_factor_1_p35) |
| 6.852    | 1.238   | 2.461 | 2.12 x10 <sup>-06</sup> | FAR2      | fatty_acyl_CoA_reductase_2                                                                              |

|          |          |       |                         |               |                                                                     |
|----------|----------|-------|-------------------------|---------------|---------------------------------------------------------------------|
| 123.100  | 30.082   | 2.032 | 2.35 x10 <sup>-06</sup> | ZC3H12<br>C   | zinc_finger_CCCH-type_containing_12C                                |
| 4.961    | 0.792    | 2.635 | 2.60 x10 <sup>-06</sup> | PPP4R4        | protein_phosphatase_4_regulatory_subunit_4                          |
| 1716.965 | 432.254  | 1.989 | 2.93 x10 <sup>-06</sup> | EHD1          | EH-domain_containing_1                                              |
| 1456.352 | 367.331  | 1.987 | 3.02 x10 <sup>-06</sup> | CD83          | CD83_molecule                                                       |
| 8.210    | 1.585    | 2.367 | 3.09 x10 <sup>-06</sup> | ZEB2-<br>AS1  | ZEB2_antisense_RNA_1                                                |
| 38.808   | 9.317    | 2.057 | 3.21 x10 <sup>-06</sup> | SGPP2         | sphingosine-1-phosphate_phosphatase_2                               |
| 238.462  | 60.164   | 1.986 | 3.32 x10 <sup>-06</sup> | MYC           | v-<br>myc_myelocytomatosis_viral_oncogene_homolog<br>(avian)        |
| 34.437   | 8.276    | 2.056 | 3.37 x10 <sup>-06</sup> | HCAR2         | hydroxycarboxylic_acid_receptor_2                                   |
| 1.358    | 0        | 7.662 | 3.61 x10 <sup>-06</sup> | PCNPP<br>3    | PEST_containing_nuclear_protein_pseudogene_<br>3                    |
| 8130.583 | 2083.563 | 1.964 | 3.80 x10 <sup>-06</sup> | THBS1         | thrombospondin_1                                                    |
| 3.248    | 0.396    | 3.013 | 3.90 x10 <sup>-06</sup> | CAMK1<br>G    | calcium/calmodulin-dependent_protein_kinase_IG                      |
| 925.673  | 237.784  | 1.960 | 4.04 x10 <sup>-06</sup> | AQP9          | aquaporin_9                                                         |
| 5.670    | 0.991    | 2.508 | 4.20 x10 <sup>-06</sup> | FERMT<br>2    | fermitin_family_member_2                                            |
| 388.143  | 100.059  | 1.955 | 4.42 x10 <sup>-06</sup> | MAFF          | vmaf_musculoaponeurotic_fibrosarcoma_oncoge<br>ne_homolog_F_(avian) |
| 2.480    | 0.247    | 3.288 | 4.66 x10 <sup>-06</sup> | LINC00<br>299 | long_intergenic_non-protein_coding_RNA_299                          |
| 1279.026 | 335.316  | 1.931 | 5.46 x10 <sup>-06</sup> | TNFAIP<br>2   | tumor_necrosis_factor_alpha-induced_protein_2                       |
| 9.510    | 2.031    | 2.222 | 5.92 x10 <sup>-06</sup> | CMKLR<br>1    | chemokine-like_receptor_1                                           |
| 2.421    | 0.247    | 3.254 | 6.09 x10 <sup>-06</sup> | WNT5B         | wingless-<br>type_MMTV_integration_site_family_member_5B            |
| 6.320    | 25.770   | -2.02 | 6.42 x10 <sup>-06</sup> | PFKFB4        | 6-phosphofructo-2-kinase/fructose-26-<br>biphosphatase_4            |
| 3.603    | 15.363   | -2.09 | 7.46 x10 <sup>-06</sup> | LINGO3        | leucine_rich_repeat_and_lg_domain_containing_<br>3                  |
| 17.130   | 4.113    | 2.056 | 8.44 x10 <sup>-06</sup> | HDAC9         | histone_deacetylase_9                                               |
| 8.033    | 1.685    | 2.248 | 8.51 x10 <sup>-06</sup> | GGT5          | gamma-glutamyltransferase_5                                         |
| 134.087  | 35.930   | 1.899 | 9.23 x10 <sup>-06</sup> | ADM           | adrenomedullin                                                      |
| 388.143  | 105.808  | 1.875 | 1.02 x10 <sup>-05</sup> | PMAIP1        | phorbol-12-myristate-13-acetate-<br>induced_protein_1               |
| 11.459   | 43.760   | -1.93 | 1.03 x10 <sup>-05</sup> | CD300L<br>B   | CD300_molecule-like_family_member_b                                 |
| 11.282   | 43.165   | -1.93 | 1.03 x10 <sup>-05</sup> | TMEM1<br>70B  | transmembrane_protein_170B                                          |
| 1.831    | 0.148    | 3.563 | 1.06 x10 <sup>-05</sup> | COL17A<br>1   | collagen_type_XVII_alpha_1                                          |
| 63.794   | 17.147   | 1.895 | 1.18 x10 <sup>-05</sup> | PSTPIP<br>2   | proline-serine-<br>threonine_phosphatase_interacting_protein_2      |
| 27.526   | 7.136    | 1.946 | 1.18 x10 <sup>-05</sup> | SMCO4         | single-pass_membrane_protein_with_coiled-<br>coil_domains_4         |
| 15.712   | 3.865    | 2.021 | 1.21 x10 <sup>-05</sup> | ADAMDE<br>C1  | ADAM-like_decysin_1                                                 |
| 1000.455 | 276.688  | 1.854 | 1.22 x10 <sup>-05</sup> | PLEK          | pleckstrin                                                          |
| 407.400  | 112.697  | 1.853 | 1.26 x10 <sup>-05</sup> | MSC           | musculin                                                            |
| 71.828   | 19.476   | 1.882 | 1.27 x10 <sup>-05</sup> | SNX10         | sorting_nexin_10                                                    |
| 15.948   | 3.964    | 2.006 | 1.41 x10 <sup>-05</sup> | RBKS          | ribokinase                                                          |

|          |         |       |                         |          |                                                                                                                                 |
|----------|---------|-------|-------------------------|----------|---------------------------------------------------------------------------------------------------------------------------------|
| 3.130    | 0.446   | 2.792 | 1.44 x10 <sup>-05</sup> | MAFG-AS1 | MAFG_antisense_RNA_1_(head_to_head)                                                                                             |
| 216.075  | 60.313  | 1.840 | 1.51 x10 <sup>-05</sup> | MX2      | myxovirus_(influenza_virus)_resistance_2_(mouse)                                                                                |
| 249.094  | 69.630  | 1.838 | 1.52 x10 <sup>-05</sup> | EIF1B    | eukaryotic_translation_initiation_factor_1B                                                                                     |
| 4.725    | 0.892   | 2.396 | 1.53 x10 <sup>-05</sup> | SLC1A2   | solute_carrier_family_1_(glial_high_affinity_glutamate_transporter)_member_2                                                    |
| 1.476    | 0.049   | 4.719 | 1.58 x10 <sup>-05</sup> | ZDHHC4P1 | zinc_finger_DHHC-type_containing_4_pseudogene_1                                                                                 |
| 35.441   | 9.515   | 1.896 | 1.58 x10 <sup>-05</sup> | CDKN2B   | cyclin-dependent_kinase_inhibitor_2B_(p15_inhibits_CDK4)                                                                        |
| 119.910  | 33.650  | 1.833 | 1.80 x10 <sup>-05</sup> | NBN      | nibrin                                                                                                                          |
| 1004.59  | 285.509 | 1.815 | 1.81 x10 <sup>-05</sup> | PNRC1    | proline-rich_nuclear_receptor_coactivator_1                                                                                     |
| 1.890    | 8.276   | -2.12 | 1.85 x10 <sup>-05</sup> | NLRP12   | NLR_family_pyrin_domain_containing_12                                                                                           |
| 750.356  | 213.550 | 1.813 | 1.86 x10 <sup>-05</sup> | WTAP     | Wilms_tumor_1_associated_protein                                                                                                |
| 8.860    | 32.857  | -1.89 | 1.86 x10 <sup>-05</sup> | LYL1     | lymphoblastic_leukemia_derived_sequence_1                                                                                       |
| 2.421    | 0.297   | 2.997 | 1.87 x10 <sup>-05</sup> | GPR141   | G_protein-coupled_receptor_141                                                                                                  |
| 46.014   | 12.687  | 1.858 | 1.98 x10 <sup>-05</sup> | TMEM106  | transmembrane_protein_106A                                                                                                      |
| 219.973  | 62.593  | 1.813 | 1.98 x10 <sup>-05</sup> | C15orf48 | chromosome_15_open_reading_frame_48                                                                                             |
| 13.054   | 47.428  | -1.86 | 2.01 x10 <sup>-05</sup> | SLC37A2  | solute_carrier_family_37_(glycerol-3-phosphate_transporter)_member_2                                                            |
| 45.896   | 12.687  | 1.854 | 2.04 x10 <sup>-05</sup> | GJA3     | gap_junction_protein_alpha_3_46kDa                                                                                              |
| 842.740  | 241.749 | 1.801 | 2.08 x10 <sup>-05</sup> | MARCKS   | myristoylated_alanine-rich_protein_kinase_C_substrate                                                                           |
| 28.648   | 7.7807  | 1.879 | 2.14 x10 <sup>-05</sup> | LRP12    | low_density_lipoprotein_receptor-related_protein_12                                                                             |
| 16.952   | 4.410   | 1.940 | 2.16 x10 <sup>-05</sup> | SLC1A3   | solute_carrier_family_1_(glial_high_affinity_glutamate_transporter)_member_3                                                    |
| 12.699   | 45.842  | -1.85 | 2.17 x10 <sup>-05</sup> | PHF23    | PHD_finger_protein_23                                                                                                           |
| 4.430    | 0.8425  | 2.385 | 2.17 x10 <sup>-05</sup> | PRG4     | proteoglycan_4                                                                                                                  |
| 3.839    | 0.693   | 2.456 | 2.18 x10 <sup>-05</sup> | ADRA2B   | adrenoceptor_alpha_2B                                                                                                           |
| 24.513   | 86.877  | -1.82 | 2.21 x10 <sup>-05</sup> | CXXC5    | CXXC_finger_protein_5                                                                                                           |
| 10.573   | 38.259  | -1.85 | 2.37 x10 <sup>-05</sup> | RAI14    | retinoic_acid_induced_14                                                                                                        |
| 58.065   | 16.354  | 1.827 | 2.39 x10 <sup>-05</sup> | GADD45A  | growth_arrest_and_DNA-damage-inducible_alpha_nuclear_factor_of_kappa_light_polypeptide_gene_enhancer_in_B-cells_inhibitor_alpha |
| 2673.886 | 779.316 | 1.778 | 2.56 x10 <sup>-05</sup> | NFKBIA   |                                                                                                                                 |
| 26.226   | 7.186   | 1.866 | 2.60 x10 <sup>-05</sup> | HCAR3    | hydroxycarboxylic_acid_receptor_3                                                                                               |
| 4.607    | 17.593  | -1.93 | 2.60 x10 <sup>-05</sup> | AVPI1    | arginine_vasopressin-induced_1                                                                                                  |
| 134.323  | 38.755  | 1.793 | 2.65 x10 <sup>-05</sup> | PILRA    | paired_immunoglobulin-like_type_2_receptor_alpha                                                                                |
| 119.0245 | 34.493  | 1.786 | 2.87 x10 <sup>-05</sup> | SAMD9L   | sterile_alpha_motif_domain_containing_9-like                                                                                    |
| 1.653    | 0.099   | 3.971 | 2.88 x10 <sup>-05</sup> | BLACE    | B-cell_acute_lymphoblastic_leukemia_expressed                                                                                   |
| 1.653    | 0.148   | 3.417 | 2.88 x10 <sup>-05</sup> | CES1P1   | carboxylesterase_1_pseudogene_1                                                                                                 |
| 30.361   | 8.474   | 1.840 | 2.96 x10 <sup>-05</sup> | DFNA5    | deafness_autosomal_dominant_5                                                                                                   |
| 2.539    | 0.346   | 2.848 | 3.04 x10 <sup>-05</sup> | TULP2    | tubby_like_protein_2                                                                                                            |
| 0        | 1.040   | -7.28 | 3.05 x10 <sup>-05</sup> | PTPRH    | protein_tyrosine_phosphatase_receptor_type_H                                                                                    |

# B.

| LPS | LEC10 | Log2 Fold | P value | Gene Name | Gene Description |
|-----|-------|-----------|---------|-----------|------------------|
|-----|-------|-----------|---------|-----------|------------------|

|          |         |       |                         |         |                                                                           |
|----------|---------|-------|-------------------------|---------|---------------------------------------------------------------------------|
| 66.397   | 6.369   | 3.380 | 3.99 x10 <sup>-13</sup> | IFNG    | Interferon-gamma                                                          |
| 131.870  | 16.719  | 2.979 | 3.19 x10 <sup>-11</sup> | USP18   | ubiquitin_specific_peptidase_18                                           |
| 44.223   | 6.687   | 2.724 | 2.05 x10 <sup>-09</sup> | CXCL11  | chemokine_(C-X-C_motif)_ligand_11                                         |
| 1395.944 | 265.063 | 2.396 | 2.88 x10 <sup>-08</sup> | RSAD2   | radical_S-adenosyl_methionine_domain_containing_2                         |
| 393.764  | 74.572  | 2.400 | 2.95 x10 <sup>-08</sup> | IFI6    | interferon_alpha-inducible_protein_6                                      |
| 15.275   | 2.653   | 2.521 | 1.50 x10 <sup>-07</sup> | CACNA1A | calcium_channel_voltage-dependent_P/Q_type_alpha_1A_subunit               |
| 7.329    | 1.114   | 2.709 | 3.69 x10 <sup>-07</sup> | FAM19A2 | family_with_sequence_similarity_19_(chemokine_(C-C_motif)-like)_member_A2 |
| 91.465   | 19.956  | 2.196 | 4.74 x10 <sup>-07</sup> | LAMP3   | lysosomal-associated_membrane_protein_3                                   |
| 20.017   | 3.980   | 2.328 | 5.25 x10 <sup>-07</sup> | BCL2L14 | BCL2-like_14_(apoptosis_facilitator)                                      |
| 24.575   | 5.095   | 2.268 | 7.22 x10 <sup>-07</sup> | SIGLEC1 | sialic_acid_binding_Ig-like_lectin_1_sialoadhesin                         |
| 1500.467 | 345.580 | 2.118 | 7.24 x10 <sup>-07</sup> | ISG15   | ISG15_ubiquitin-like_modifier                                             |
| 3.202    | 0.318   | 3.301 | 9.76 x10 <sup>-07</sup> | CCNA1   | cyclin_A1                                                                 |

**C.**

| Symbol      | Entrez Gene Name                           | LPS    | LEC10  | LEC10 + LPS | LEC50  | LEC50 + LPS |
|-------------|--------------------------------------------|--------|--------|-------------|--------|-------------|
| IL6         | interleukin 6                              | 9.671  | 9.724  | 9.724       | 9.917  | 9.865       |
| IL1A        | interleukin 1 alpha                        | 8.788  | 8.816  | 8.816       | 9.167  | 8.843       |
| CCL20       | C-C motif chemokine ligand 20              | 8.674  | 8.764  | 8.764       | 9.231  | 8.888       |
| CSF3        | colony stimulating factor 3                | 14.018 | 14.054 | 14.054      | 14.629 | 14.428      |
| INHBA       | inhibin subunit beta A                     | 7.711  | 7.668  | 7.668       | 7.583  | 7.587       |
| F3          | coagulation factor III, tissue factor      | 7.579  | 7.674  | 7.674       | 8.117  | 7.857       |
| IL1B        | interleukin 1 beta                         | 7.304  | 7.380  | 7.380       | 7.749  | 7.572       |
| ACOD1       | aconitate decarboxylase 1                  | 7.546  | 7.539  | 7.539       | 7.252  | 7.811       |
| MIR3945HG   | MIR3945 host gene                          | 7.453  | 7.541  | 7.541       | 7.489  | 7.526       |
| PTGS2       | prostaglandin-endoperoxide synthase 2      | 7.018  | 7.012  | 7.012       | 7.354  | 7.263       |
| TNFAIP6     | TNF alpha induced protein 6                | 6.695  | 6.671  | 6.671       | 6.757  | 6.659       |
| DNAAF1      | dynein axonemal assembly factor 1          | 6.930  | 7.036  | 7.036       | 6.981  | 7.141       |
| CSF2        | colony stimulating factor 2                | 7.311  | 7.399  | 7.399       | 8.025  | 7.84        |
| CXCL11      | C-X-C motif chemokine ligand 11            | 6.662  | 6.324  | 6.324       | 5.338  | 6.432       |
| KCNJ2-AS1   | KCNJ2 antisense RNA 1                      | 8.637  | 8.511  | 8.511       | 8.857  | 8.535       |
| RHCG        | Rh family C glycoprotein                   | 11.507 | 11.269 | 11.269      | 11.039 | 11.306      |
| CLEC12A-AS1 | CLEC12A antisense RNA 1                    | 11.252 | 11.396 | 11.396      | 11.543 | 11.66       |
| FRMD7       | FERM domain containing 7                   | 10.739 | 10.902 | 10.902      | 11.371 | 11.338      |
| CFAP58-DT   | CFAP58 divergent transcript                | 10.449 | 10.107 | 10.107      | 10.009 | 10.125      |
| ZNF259P1    | zinc finger protein 259 pseudogene 1       | 7.316  | 7.053  | 7.053       | 7.401  | 7.474       |
| IL12B       | interleukin 12B                            | 9.513  | 9.761  | 9.761       | 9.497  | 9.525       |
| RANBP3L     | RAN binding protein 3 like                 | 9.222  | 9.346  | 9.346       | 9.140  | 9.040       |
| TMEM54      | transmembrane protein 54                   | 9.063  | 8.993  | 8.993       | 9.140  | 9.936       |
| ANO5        | anoctamin 5                                | 8.742  | 8.449  | 8.449       | 7.394  | 8.663       |
| IDO2        | indoleamine 2,3-dioxygenase 2              | 8.616  | 9.145  | 9.145       | 8.351  | 9.084       |
| HPN         | hepsin                                     | 8.583  | 7.152  | 7.152       | 7.668  | 7.273       |
| IL36RN      | interleukin 36 receptor antagonist         | 8.515  | 7.942  | 7.942       | 8.142  | 8.774       |
| LINC00158   | long intergenic non-protein coding RNA 158 | 8.443  | 8.698  | 8.698       | 7.467  | 8.342       |
| IFNB1       | interferon beta 1                          | 8.443  | 8.194  | 8.194       | 8.534  | 8.851       |



|               |                                                           |       |       |       |       |       |
|---------------|-----------------------------------------------------------|-------|-------|-------|-------|-------|
| TSLP          | thymic stromal lymphopoietin                              | 8.405 | 8.369 | 8.369 | 8.998 | 8.574 |
| PCNPP3        | PEST containing nuclear protein pseudogene 3              | 8.245 | 8.731 | 8.731 | 8.312 | 8.511 |
| MAS1          | MAS1 proto-oncogene, G protein-coupled receptor           | 8.113 | 7.827 | 7.827 | 6.736 | 7.829 |
| MMP10         | matrix metalloproteinase 10                               | 8.065 | 7.766 | 7.766 | 8.351 | 8.342 |
| FGF13         | fibroblast growth factor 13                               | 8.065 | 8.597 | 8.597 | 9.094 | 9.392 |
| LY6E-DT       | LY6E divergent transcript                                 | 8.065 | 7.565 | 7.565 | 7.148 | 7.547 |
| PCDH17        | protocadherin 17                                          | 7.914 | 5.588 | 5.588 | 6.325 | 6.615 |
| NBEAP1        | neurobeachin pseudogene 1                                 | 7.914 | 6.709 | 6.709 | 7.234 | 7.777 |
| PDGFRL        | platelet derived growth factor receptor like              | 7.860 | 7.152 | 7.152 | 5.492 | 8.065 |
| TNFSF18       | TNF superfamily member 18                                 | 7.745 | 7.245 | 7.245 | 8.050 | 8.150 |
| ADCY10        | adenylate cyclase 10                                      | 7.684 | 7.414 | 7.414 | 6.612 | 6.491 |
| NR5A2         | nuclear receptor subfamily 5 group A member 2             | 7.684 | 6.709 | 6.709 | 7.668 | 7.777 |
| C2CD4B        | C2 calcium dependent domain containing 4B                 | 7.553 | 7.766 | 7.766 | 8.39  | 8.065 |
| ADAD2         | adenosine deaminase domain containing 2                   | 7.483 | 7.332 | 7.332 | 7.394 | 7.113 |
| LINC01185     | long intergenic non-protein coding RNA 1185               | 7.483 | 5.588 | 5.588 | 6.325 | 6.037 |
| IGHV1-3       | immunoglobulin heavy variable 1-3                         | 7.483 | 7.152 | 7.152 | 7.055 | 7.547 |
| NRBF2P2       | nuclear receptor binding factor 2 pseudogene 2            | 7.483 | 7.054 | 7.054 | 6.476 | 7.416 |
| TCP10/TCP10L2 | t-complex 10                                              | 7.483 | 7.414 | 7.414 | 6.956 | 7.777 |
| ABCA13        | ATP binding cassette subfamily A member 13                | 7.410 | 7.827 | 7.827 | 7.316 | 7.928 |
| XIAPP3        | X-linked inhibitor of apoptosis pseudogene 3              | 7.410 | 6.573 | 6.573 | 3.292 | 6.835 |
| TMEM26        | transmembrane protein 26                                  | 7.332 | 6.709 | 6.709 | 6.158 | 6.491 |
| BHLHE22       | basic helix-loop-helix family member e22                  | 7.332 | 7.702 | 7.702 | 6.736 | 7.928 |
| ACAN          | aggrekan                                                  | 7.250 | 6.573 | 6.573 | 6.476 | 6.934 |
| INSRR         | insulin receptor related receptor                         | 7.250 | 0     | 0     | 3.292 | 4.102 |
| C6orf52       | chromosome 6 open reading frame 52                        | 7.163 | 4.871 | 4.871 | 0     | 4.659 |
| SERPINA6      | serpin family A member 6                                  | 7.163 | 6.709 | 6.709 | 6.476 | 7.416 |
| HSPE1P4       | heat shock protein family E (Hsp10) member 1 pseudogene 4 | 7.163 | 7.332 | 7.332 | 5.178 | 6.934 |
| KRT8P31       | keratin 8 pseudogene 31                                   | 7.163 | 5.846 | 5.846 | 6.476 | 6.355 |
| MTND4P23      | MT-ND4 pseudogene 23                                      | 7.071 | 3.381 | 3.381 | 5.968 | 5.63  |
| TMEM26-AS1    | TMEM26 antisense RNA 1                                    | 7.071 | 6.422 | 6.422 | 6.85  | 7.113 |
| LINC01262     | long intergenic non-protein coding RNA 1262               | 7.071 | 6.948 | 6.948 | 8.427 | 6.491 |
| RPL23AP93     | ribosomal protein L23a pseudogene 93                      | 6.972 | 7.054 | 7.054 | 7.95  | 7.829 |
| SERPINB7      | serpin family B member 7                                  | 6.972 | 6.948 | 6.948 | 7.316 | 6.729 |
| TEX41         | testis expressed 41                                       | 6.972 | 6.422 | 6.422 | 6.956 | 7.416 |
| C4orf45       | chromosome 4 open reading frame 45                        | 6.866 | 7.635 | 7.635 | 6.612 | 6.491 |
| RSPO3         | R-spondin 3                                               | 6.866 | 7.332 | 7.332 | 5.492 | 7.273 |
| LINC00309     | long intergenic non-protein coding RNA 309                | 6.866 | 6.833 | 6.833 | 7.148 | 7.608 |
| HSD11B1       | hydroxysteroid 11-beta dehydrogenase 1                    | 6.866 | 4.310 | 4.310 | 4.217 | 6.355 |

|           |                                            |       |       |       |       |       |
|-----------|--------------------------------------------|-------|-------|-------|-------|-------|
| CCDC116   | coiled-coil domain containing 116          | 6.752 | 5.588 | 5.588 | 5.178 | 5.848 |
| TMEM139   | transmembrane protein 139                  | 6.752 | 5.846 | 5.846 | 6.85  | 5.63  |
| BARX1     | BARX homeobox 1                            | 6.752 | 0     | 0     | 5.178 | 4.102 |
| SPATC1    | spermatogenesis and centriole associated 1 | 6.752 | 7.766 | 7.766 | 6.85  | 6.934 |
| LINC00589 | long intergenic non-protein coding RNA 589 | 6.752 | 6.064 | 6.064 | 5.492 | 6.615 |
| CKMT2     | creatine kinase, mitochondrial 2           | 6.752 | 3.381 | 3.381 | 4.776 | 5.372 |

**D.**

| Symbol          | Entrez Gene Name                                      | LPS    | LEC10  | LEC10+<br>LPS | LEC50  | LEC50 + LPS |
|-----------------|-------------------------------------------------------|--------|--------|---------------|--------|-------------|
| DMBX1           | diencephalon/mesencephalon homeobox 1                 | -5.479 | -5.417 | -5.417        | -2.2   | -5.6        |
| PGM5            | phosphoglucosmutase 5                                 | -5.479 | -5.417 | -5.417        | -5.492 | -5.6        |
| KANK4           | KN motif and ankyrin repeat domains 4                 | -5.479 | -1.107 | -1.107        | -2.2   | -5.6        |
| PCYT1B          | phosphate cytidylyltransferase 1, choline, beta       | -5.479 | -5.417 | -5.417        | -1.275 | -1.498      |
| ANKRD33         | ankyrin repeat domain 33                              | -5.479 | -5.417 | -5.417        | -5.492 | -2.416      |
| FOXP1-AS1       | FOXP1 antisense RNA 1                                 | -5.479 | 0.171  | 0.171         | -1.275 | -0.541      |
| ACY1            | aminoacylase 1                                        | -5.479 | 1.006  | 1.006         | -2.2   | -0.541      |
| COLEC12         | collectin subfamily member 12                         | -5.479 | -5.417 | -5.417        | -2.2   | -5.6        |
| HHIP-AS1        | HHIP antisense RNA 1                                  | -5.479 | -2.036 | -2.036        | -1.275 | -0.941      |
| FAM243A/FAM243B | family with sequence similarity 243 member A          | -5.479 | 1.156  | 1.156         | -0.716 | -0.941      |
| TRAV36DV7       | T cell receptor alpha variable 36/delta variable 7    | -5.479 | 1.156  | 1.156         | 0      | 0.755       |
| RPS27AP12       | ribosomal protein S27a pseudogene 12                  | -5.479 | -2.036 | -2.036        | -1.275 | -1.498      |
| ZNRF2P1         | zinc and ring finger 2 pseudogene 1                   | -5.479 | 1.416  | 1.416         | -0.314 | -5.6        |
| RBP4            | retinol binding protein 4                             | -5.479 | 0.838  | 0.838         | 0.666  | -2.416      |
| UTS2            | urotensin 2                                           | -5.479 | -2.036 | -2.036        | -5.492 | -1.498      |
| PTTG4P          | pituitary tumor-transforming 4 pseudogene             | -5.479 | -2.036 | -2.036        | 0.257  | -5.6        |
| KAZN            | kazrin, periplakin interacting protein                | -5.479 | -1.107 | -1.107        | -2.2   | -0.941      |
| DUTP1           | deoxyuridine triphosphatase pseudogene 1              | -5.479 | -0.546 | -0.546        | -2.2   | -2.416      |
| TNFRSF17        | TNF receptor superfamily member 17                    | -5.479 | -0.546 | -0.546        | 0.833  | -2.416      |
| TNNC2           | troponin C2, fast skeletal type                       | -5.479 | 1.828  | 1.828         | 0.833  | 0.248       |
| RPL13AP19       | ribosomal protein L13a pseudogene 19                  | -5.479 | -1.107 | -1.107        | -2.2   | -5.6        |
| BRCC3P1         | BRCA1/BRCA2-containing complex subunit 3 pseudogene 1 | -5.479 | 0.838  | 0.838         | -1.275 | -2.416      |
| TRAJ14          | T cell receptor alpha joining 14                      | -5.479 | -2.036 | -2.036        | -0.716 | -5.6        |
| CYP7A1          | cytochrome P450 family 7 subfamily A member 1         | -5.479 | -1.107 | -1.107        | -0.314 | 0.438       |
| TEX21P          | testis expressed 21, pseudogene                       | -5.479 | -0.144 | -0.144        | -0.716 | -0.941      |
| TMC3-AS1        | TMC3 antisense RNA 1                                  | -5.479 | -0.546 | -0.546        | -5.492 | -5.6        |
| TP1P1           | triosephosphate isomerase 1 pseudogene 1              | -5.479 | -5.417 | -5.417        | -0.314 | 0.03        |
| LINC01629       | long intergenic non-protein coding RNA 1629           | -5.223 | -5.16  | -5.16         | -1.018 | -0.684      |
| GDF6            | growth differentiation factor 6                       | -5.223 | -1.78  | -1.78         | -5.235 | -2.159      |
| ESYT3           | extended synaptotagmin 3                              | -5.223 | 1.548  | 1.548         | -1.018 | -0.684      |
| CA8             | carbonic anhydrase 8                                  | -5.223 | -5.16  | -5.16         | -1.943 | -2.159      |
| SPATA3-AS1      | SPATA3 antisense RNA 1 (head to head)                 | -5.223 | -0.85  | -0.85         | -5.235 | -1.241      |

|                 |                                                                  |        |       |       |        |        |
|-----------------|------------------------------------------------------------------|--------|-------|-------|--------|--------|
| AQP6            | aquaporin 6                                                      | -5.223 | -5.16 | -5.16 | -5.235 | -2.159 |
| CYP4F22         | cytochrome P450 family 4 subfamily F member 22                   | -5.223 | -5.16 | -5.16 | -5.235 | -2.159 |
| C1orf167        | chromosome 1 open reading frame 167                              | -5.223 | -5.16 | -5.16 | -5.235 | -5.343 |
| NT5C1B          | 5'-nucleotidase, cytosolic 1B                                    | -5.223 | 1.094 | 1.094 | -0.46  | -0.684 |
| ELOVL3          | ELOVL fatty acid elongase 3                                      | -5.223 | -0.85 | -0.85 | -1.018 | -1.241 |
| CAPN14          | calpain 14                                                       | -5.223 | -5.16 | -5.16 | -5.235 | -0.684 |
| DKFZp779M0652   | uncharacterized DKFZp779M0652                                    | -5.223 | -1.78 | -1.78 | -0.058 | -2.159 |
| CD163L1         | CD163 molecule like 1                                            | -5.223 | -0.85 | -0.85 | -1.018 | -2.159 |
| CCDC38          | coiled-coil domain containing 38                                 | -5.223 | -1.78 | -1.78 | -5.235 | -1.241 |
| FHOD3           | formin homology 2 domain containing 3                            | -5.223 | -5.16 | -5.16 | -5.235 | 0.505  |
| KLC3            | kinesin light chain 3                                            | -5.223 | -5.16 | -5.16 | -5.235 | -2.159 |
| MFSD6L          | major facilitator superfamily domain containing 6 like           | -5.223 | -0.85 | -0.85 | -1.943 | -5.343 |
| KIF4A           | kinesin family member 4A                                         | -5.223 | -0.29 | -0.29 | -0.46  | -0.684 |
| UVRAG-DT        | UVRAG divergent transcript                                       | -5.223 | -5.16 | -5.16 | -0.46  | -5.343 |
| MAGEB17         | MAGE family member B17                                           | -5.223 | -5.16 | -5.16 | -5.235 | -2.159 |
| ACER1           | alkaline ceramidase 1                                            | -5.223 | -1.78 | -1.78 | -1.018 | 0.03   |
| LRFN2           | leucine rich repeat and fibronectin type III domain containing 2 | -5.223 | -5.16 | -5.16 | -1.018 | -0.284 |
| LOC441204       | uncharacterized LOC441204                                        | -5.223 | 0.685 | 0.685 | 0.256  | -0.684 |
| OSBPL10-AS1     | OSBPL10 antisense RNA 1                                          | -5.223 | -0.29 | -0.29 | 0.514  | 0.695  |
| TBX1            | T-box 1                                                          | -5.223 | -5.16 | -5.16 | -5.235 | -2.159 |
| STAB2           | stabilin 2                                                       | -5.223 | -5.16 | -5.16 | -5.235 | -0.684 |
| IQCJ-SCHIP1-AS1 | IQCJ-SCHIP1 read through antisense RNA 1                         | -5.223 | -5.16 | -5.16 | -5.235 | 0.03   |
| CHRNA5          | cholinergic receptor nicotinic alpha 5 subunit                   | -5.223 | -0.29 | -0.29 | -1.018 | -5.343 |
| LINC00520       | long intergenic non-protein coding RNA 520                       | -5.223 | -0.85 | -0.85 | -1.943 | 0.03   |
| DNMT3L          | DNA methyltransferase 3 like                                     | -5.223 | -1.78 | -1.78 | -5.235 | -5.343 |
| PRRG2           | proline rich and Gla domain 2                                    | -5.223 | -5.16 | -5.16 | -5.235 | -0.284 |
| NKX6-1          | NK6 homeobox 1                                                   | -5.223 | -5.16 | -5.16 | -0.46  | -2.159 |
| GRM4            | glutamate metabotropic receptor 4                                | -5.223 | -5.16 | -5.16 | -5.235 | -2.159 |
| CPB2            | carboxypeptidase B2                                              | -5.223 | -1.78 | -1.78 | -0.058 | -2.159 |
| METTL24         | methyltransferase like 24                                        | -5.223 | -1.78 | -1.78 | -5.235 | -5.343 |
| FERMT1          | fermitin family member 1                                         | -5.223 | -5.16 | -5.16 | -5.235 | -2.159 |
| PARVA           | parvin alpha                                                     | -5.223 | -0.29 | -0.29 | -1.943 | -0.284 |
| RPL26P27        | ribosomal protein L26 pseudogene 27                              | -5.223 | -0.85 | -0.85 | -5.235 | -2.159 |
| TRAJ25          | T cell receptor alpha joining 25 (non-functional)                | -5.223 | -5.16 | -5.16 | -1.018 | -2.159 |
| HRAT5           | heart tissue-associated transcript 5                             | -5.223 | -5.16 | -5.16 | -1.943 | -1.241 |
| HBQ1            | hemoglobin subunit theta 1                                       | -5.223 | 0.427 | 0.427 | 0.514  | -1.241 |
| NCR2            | natural cytotoxicity triggering receptor 2                       | -5.223 | -1.78 | -1.78 | 1.24   | 0.695  |

\*These data represent the genes that are upregulated by LEC10 alone as compared to a vehicle control in PBMCs (incubated for 3h). RNAs were extracted and subjected to RNAseq analysis. This data has been obtained by using the DEG program. \*These data represent the genes that are upregulated by LEC10 alone as compared to a LPS control in PBMCs (incubated for 3h). RNA was extracted and subjected to RNAseq analysis. This data has been obtained by using the DEG program.

\*\*These data represent the genes that are upregulated/downregulated by LPS, LEC10, LEC10 + LPS, LEC50 and LEC50 + LPS, as compared to vehicle controls in PBMCs (incubated for 3h). RNAs were extracted and subjected to RNAseq analysis. This data has been obtained by using the DEG program. The log2 ratios were imported into the Ingenuity Pathways Analysis.
